# Supplementary figures and images for: Spermidine and spermine exert protective effects within the lung
Source: PubMed Central journal article supplement — Pharmacol Res Perspect. 2021 Jul 21;9(4):e00837. doi: 10.1002/prp2.837 (PMC8294051; doi:10.1002/prp2.837), 2021-07-21

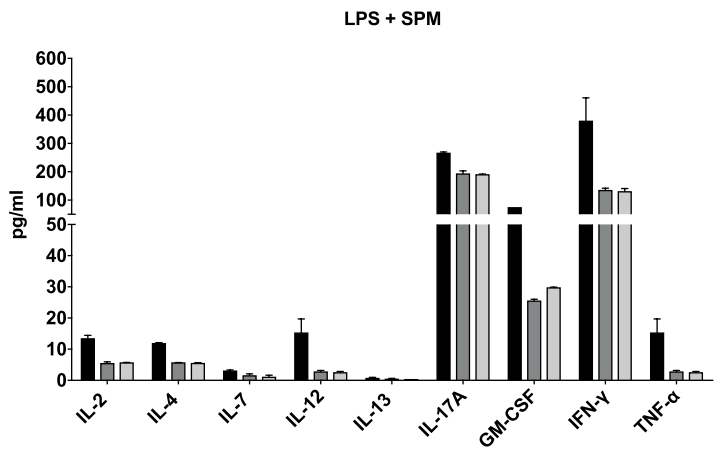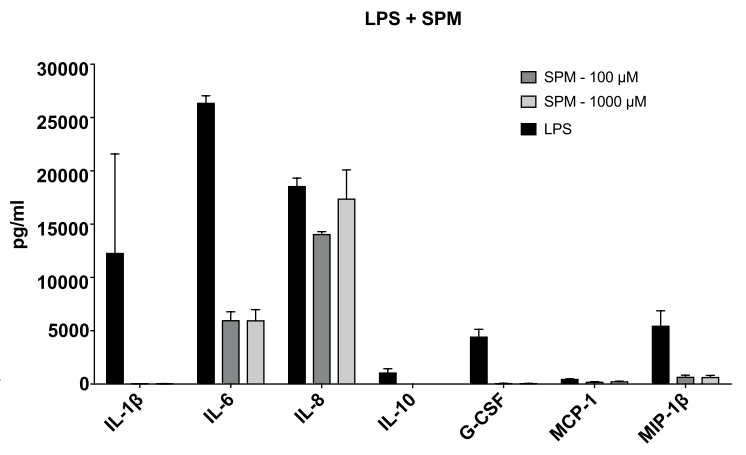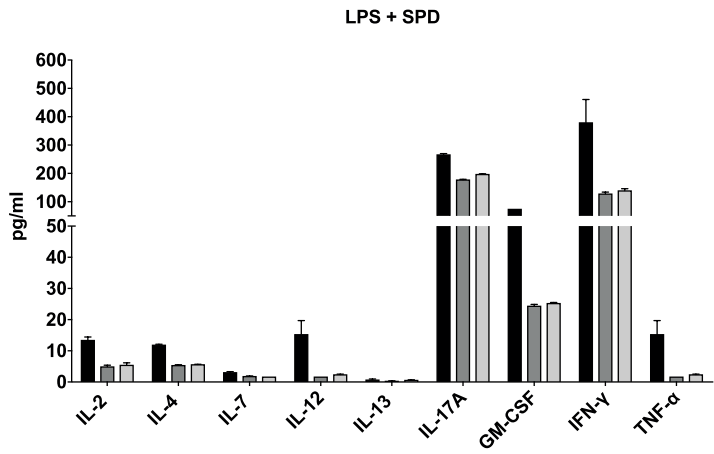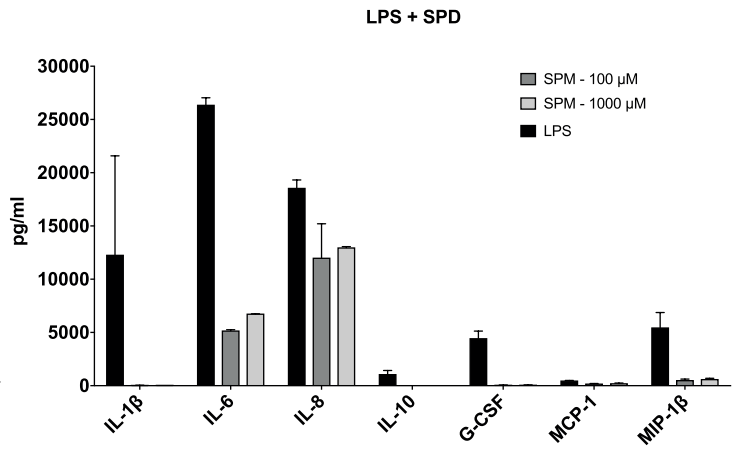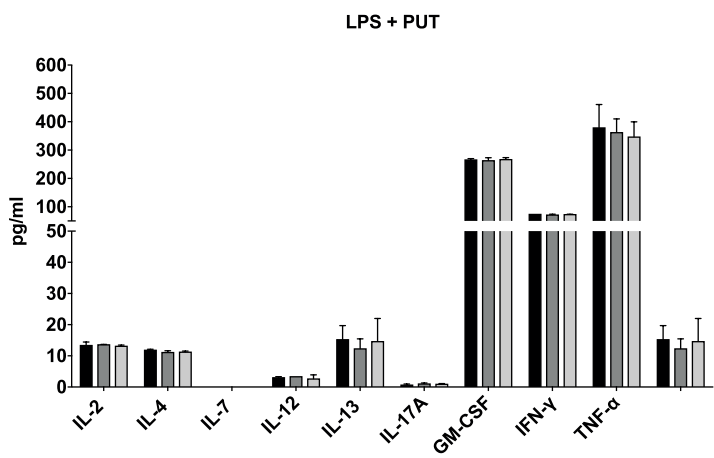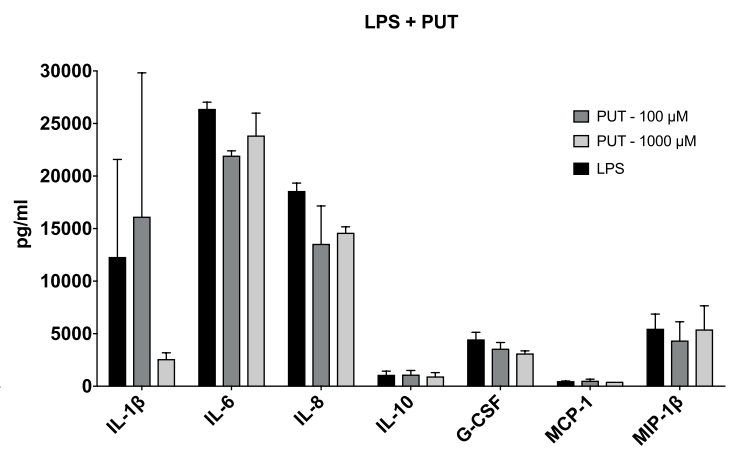

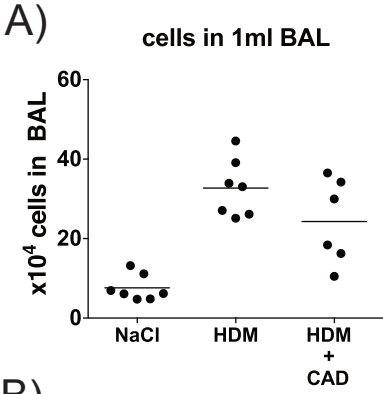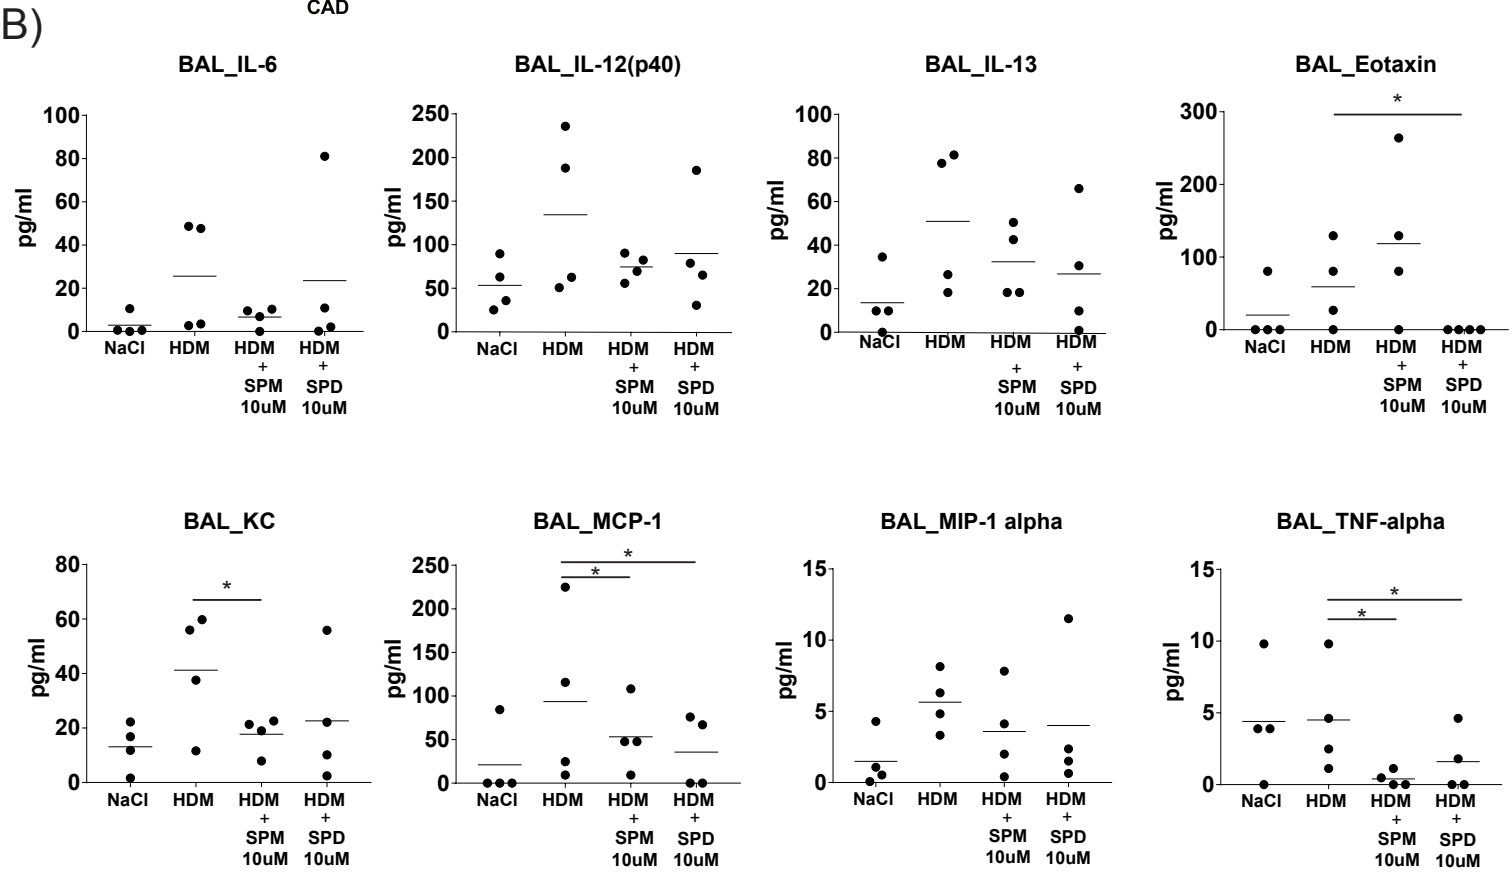

Supplementary Figure 2

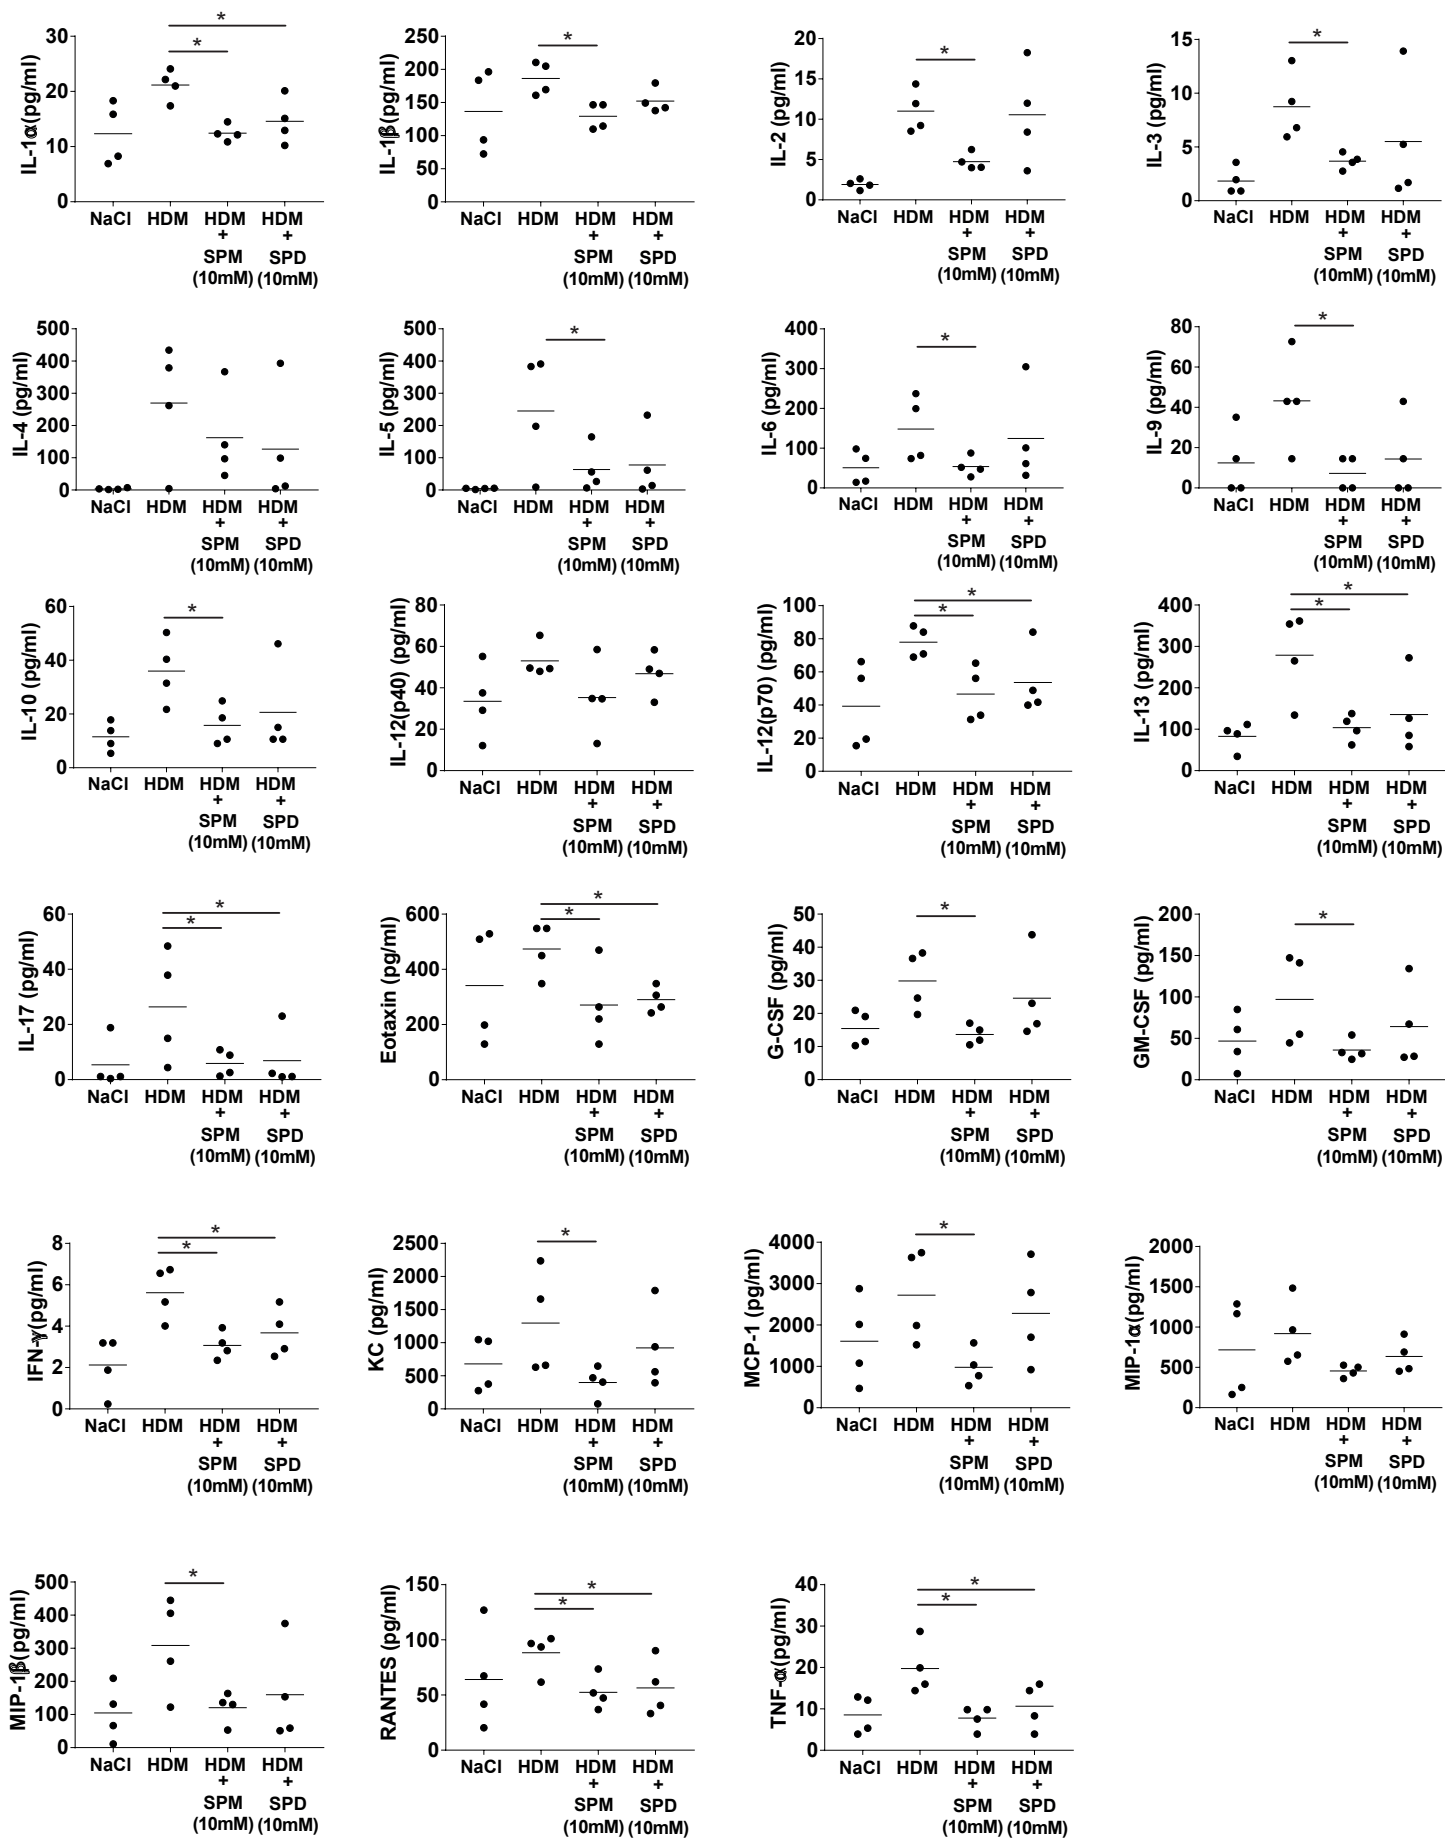

Supplement: PRP2-9-e00837-s001.pdf [file PRP2-9-e00837-s001.pdf]
